# Supplementary material for: CYP17A1 deficient XY mice display susceptibility to atherosclerosis, altered lipidomic profile and atypical sex development
Source: PubMed Central journal article supplement (PMC7260244; doi:10.1038/s41598-020-65601-0), 2020-05-29
Supplement: 41598_2020_65601_MOESM1_ESM.pdf [file 41598_2020_65601_MOESM1_ESM.pdf]

## CYP17A1 deficient XY mice display susceptibility to atherosclerosis, altered lipidomic profile and atypical sex development

Redouane Aherrahrou<sup>a,b</sup>, Alexandra E. Kulle<sup>c</sup>, Natalia Alenina<sup>d,e</sup>, Ralf Werner<sup>f,g</sup>, Simeon Vens-Cappell<sup>h</sup>, Michael Bader<sup>d,e,i,j</sup>, Heribert Schunkert<sup>k</sup>, Jeanette Erdmann<sup>a,l,\*</sup>, Zouhair Aherrahrou<sup>a,l,\*</sup>

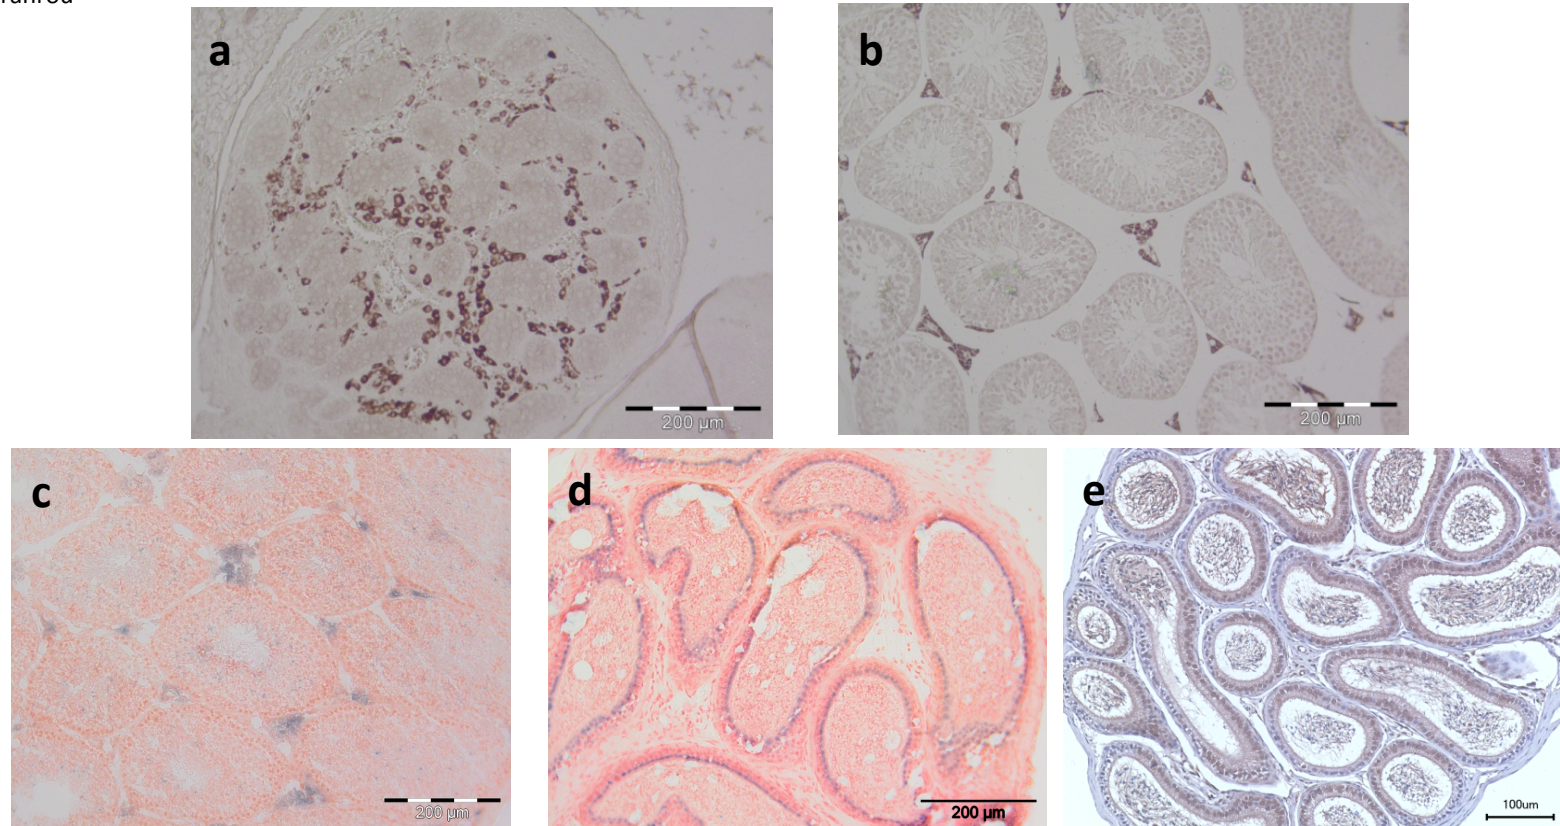

**Supplementary Figure 1: Protein expression of CYP17A1.** Immunohistological staining (brown) revealed the expression of CYP17A1 in testis of an E16 heterozygous *Cyp17a1* (+/d) mouse embryo in Leydig cells (A). CYP17A1 is also expressed in Leydig cells of a WT adult mouse testis (B). Similarly the expression of CYP17A1 was also demonstrated in Leydig cells in the interstitium (C) and in the epithelium of the epididymis (D) using X-gal staining (blue). The Expression of CYP17A1 found in the epididymis using X-gal staining, was further validated in the epididymis using immunohistological staining (E, brown).
