# Supplementary material for: CYP17A1 deficient XY mice display susceptibility to atherosclerosis, altered lipidomic profile and atypical sex development
Source: PubMed Central journal article supplement (PMC7260244; doi:10.1038/s41598-020-65601-0), 2020-05-29
Supplement: 41598_2020_65601_MOESM2_ESM.pdf [file 41598_2020_65601_MOESM2_ESM.pdf]

## CYP17A1 deficient XY mice display susceptibility to atherosclerosis, altered lipidomic profile and atypical sex development

Redouane Aherrahrou<sup>a,b</sup>, Alexandra E. Kulle<sup>c</sup>, Natalia Alenina<sup>d,e</sup>, Ralf Werner<sup>f,g</sup>, Simeon Vens-Cappell<sup>h</sup>, Michael Bader<sup>d,e,i,j</sup>, Heribert Schunkert<sup>k</sup>, Jeanette Erdmann<sup>a,l,\*</sup>, Zouhair Aherrahrou<sup>a,l,\*</sup>

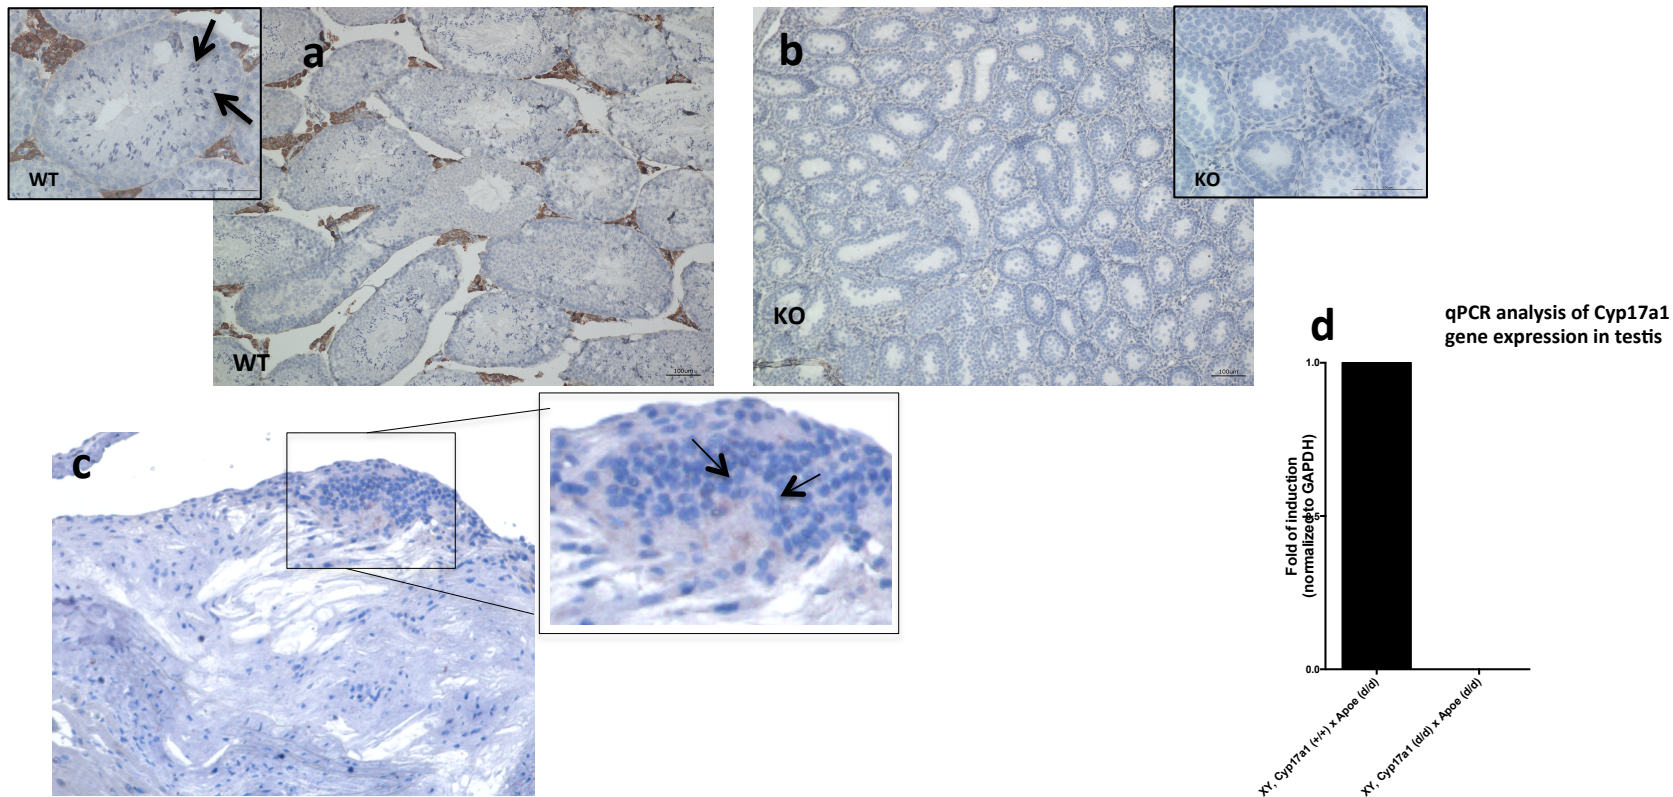

**Supplementary Figure 2: Expression of CYP17A1.** A: Testis of an adult *Cyp17a1* (+/+)x*Apoe*(d/d) mouse showing normal seminiferous tubules and spermatogenesis processes (arrays, high magnification) as well as the expression of *Cyp17a1* in Leydig cells using immunohistological staining (brown). B: Testis of an aged-matched *Cyp17a1*(d/d)x*Apoe*(d/d) mouse showing smaller tubules, missing spermatogenesis, and no expression of CYP17A1. C: Expression of CYP17A1 in aortic plaque cap of an old *Apoe*(d/d) mouse (1 year old). Cell nuclei were stained blue using Heamalaun counterstaining. D: qPCR analysis of the expression of *Cyp17a1* in testis of adult adult *Cyp17a1* (+/+)x*Apoe*(d/d) mouse. All bar scales are set to 100  $\mu$ m.
